# Supplementary material
Source: publisher site journal article supplement (https://www.dovepress.com/article/323865)
Supplement: Supplementary file 1 [file get_supplementary_file.php]

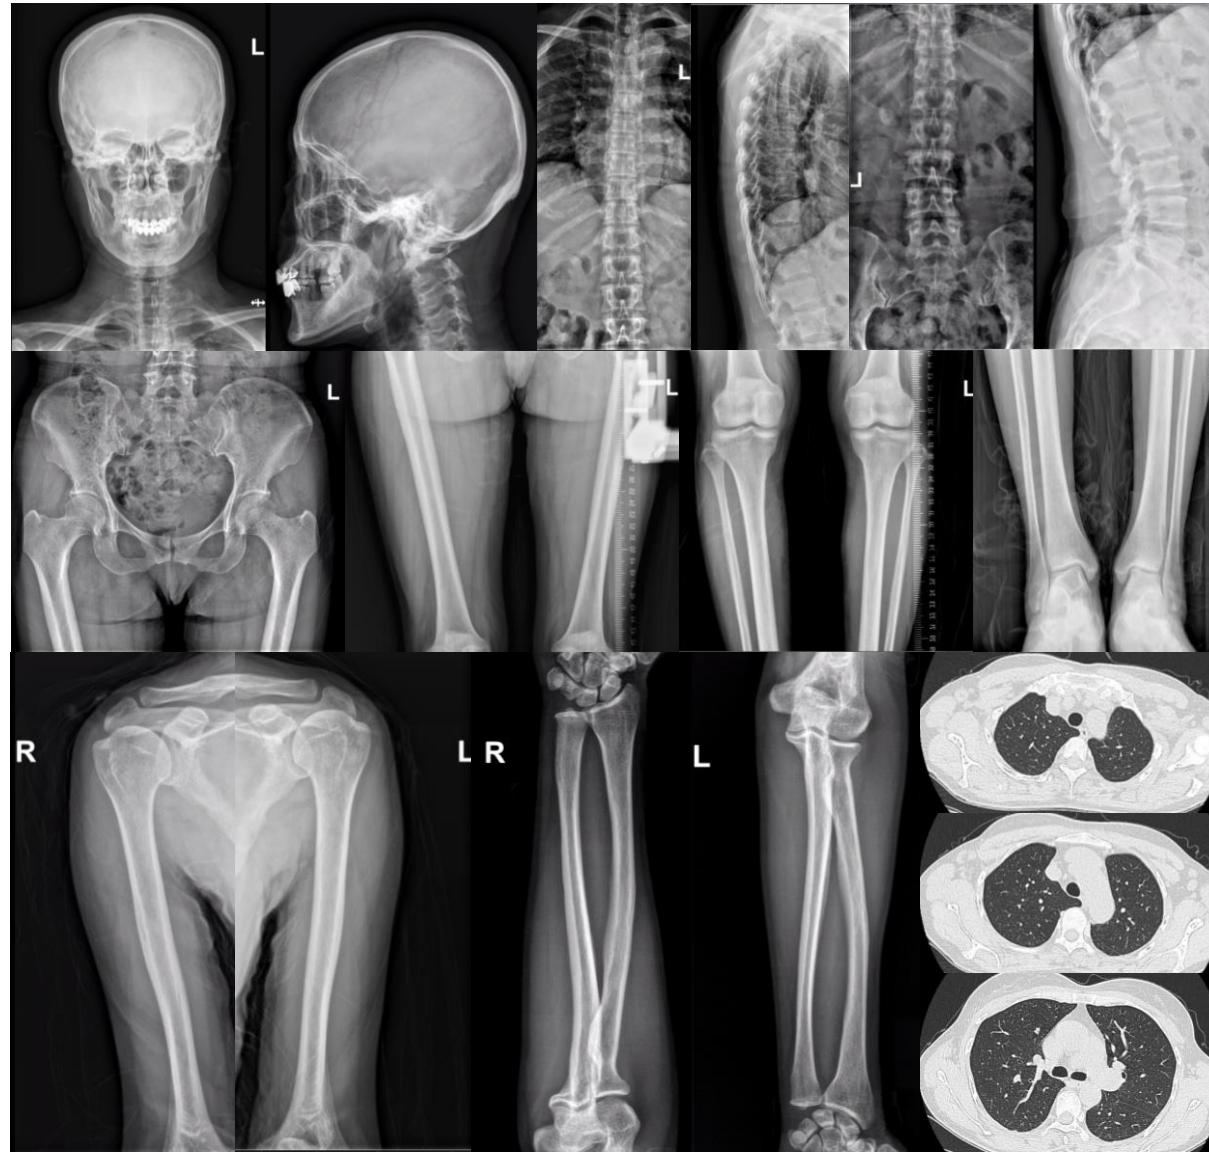

**Supplementary Figure 1:** Bone imaging of the skull, thoracolumbar spine, pelvis, and limbs did not reveal any bone lesions and the lung computed tomography (CT) scan was normal.

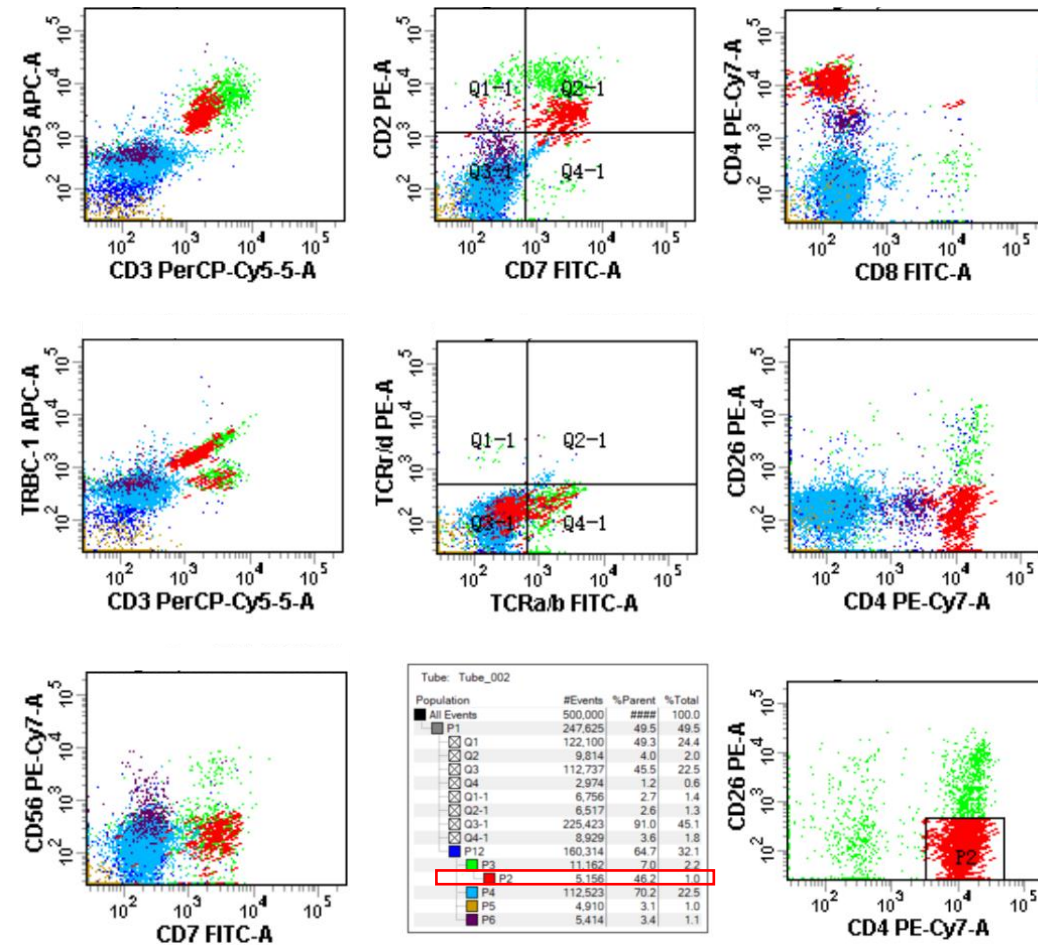

**Supplementary Figure 2:** Representative images of flow cytometric immunophenotyping of PB and CD4+CD26- cells accounting for 46.2% of total lymphocytes.

**a**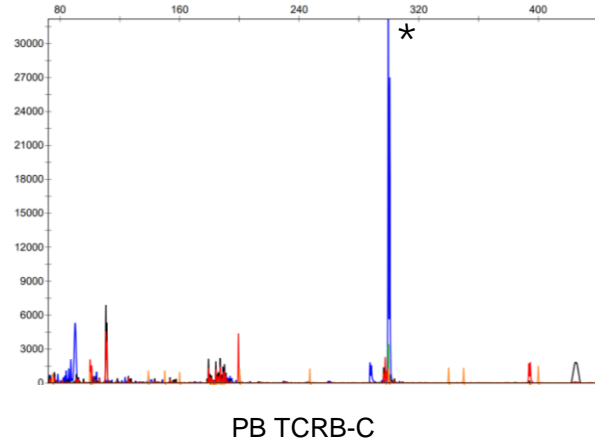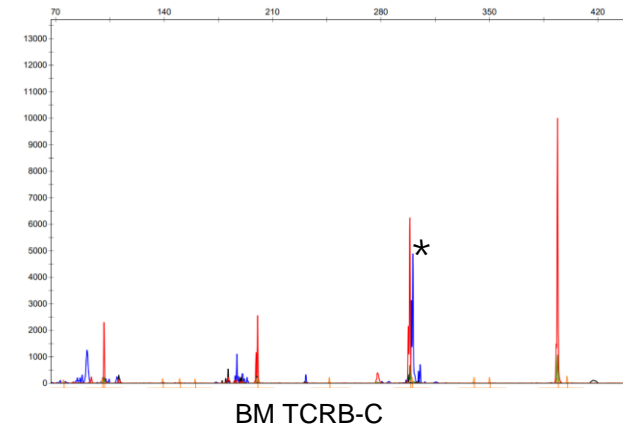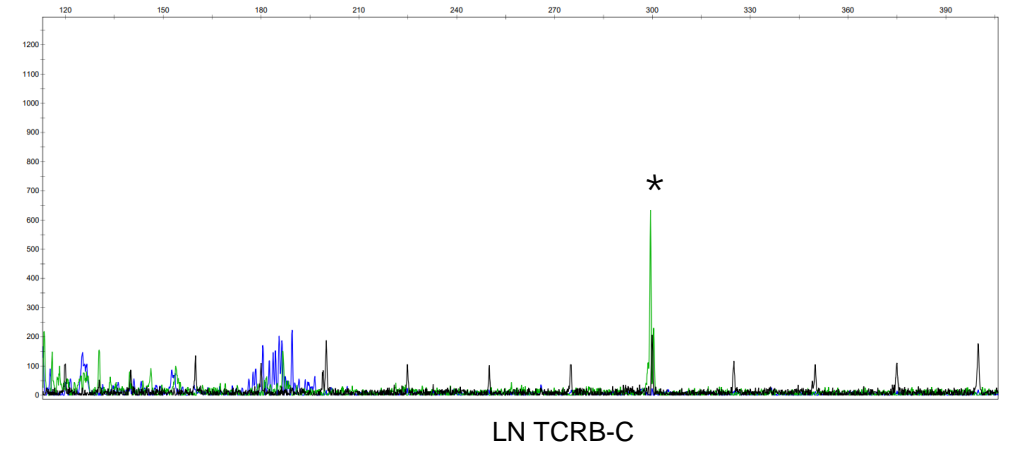**b**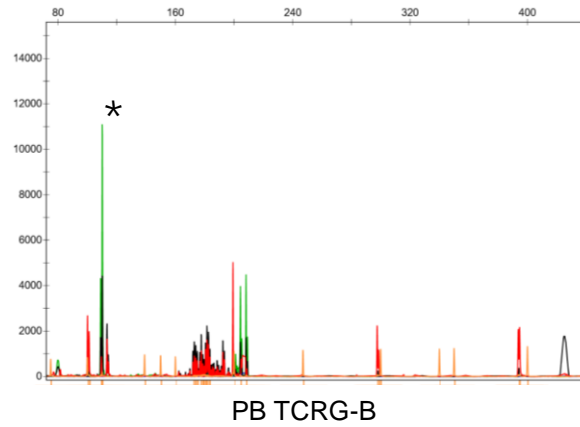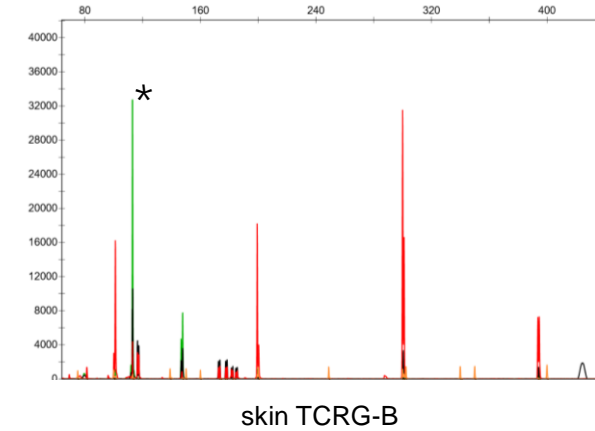

**Supplementary Figure 3:** Molecular analysis for TCR gene rearrangement. **a.** TCRB peaks of identical sizes in the PB, BM, and LN. **b.** TCRG peaks of identical sizes in the PB and skin.
